# Supplementary material for: Prosopis alba Seed as a Functional Food Waste for Food Formulation Enrichment
Source: MDPI journal article supplement (doi:10.3390/foods11182857), 2022-09-15
Supplement: s1 [file s1]

Supplementary material

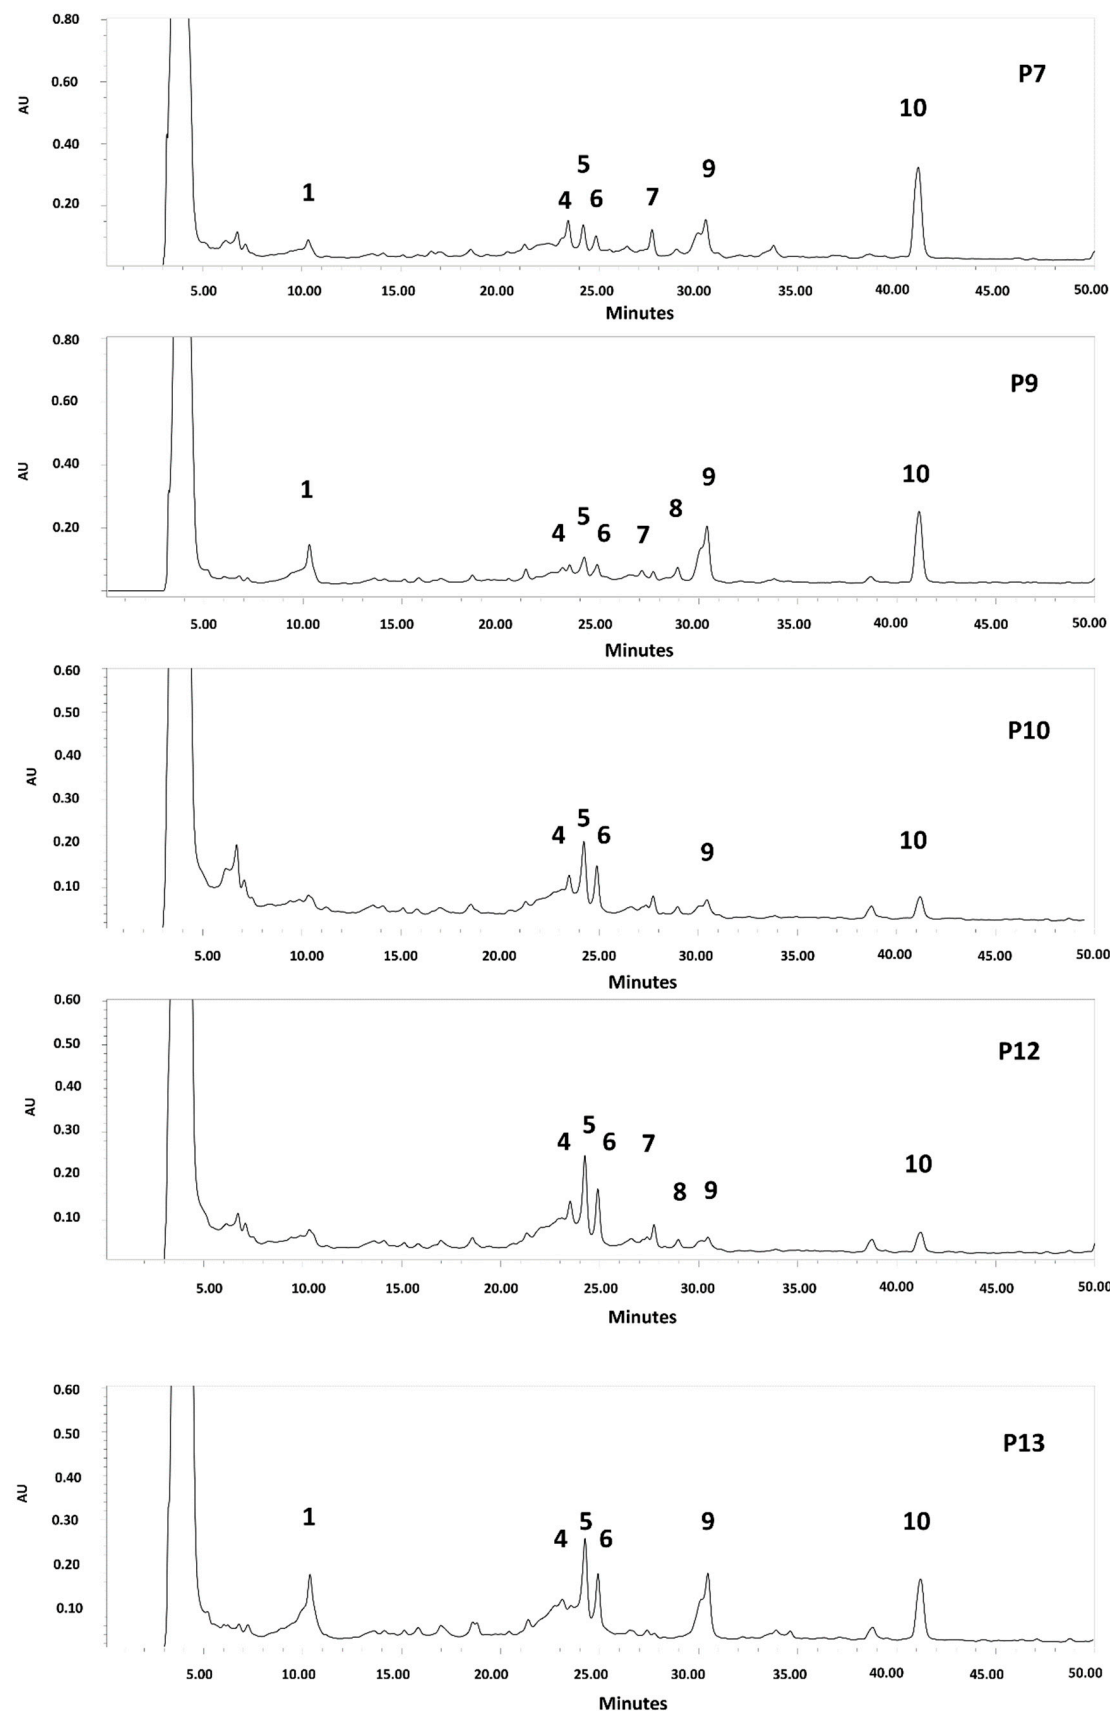

**Figure S1.** HPLC chromatogram of polyphenols from *P. alba* seed flour (Clones P7–P13). Detection: UV<sub>254</sub> nm. Compounds: 1: isoschaftoside hexoside; 2: schaftoside hexoside; 3: Vicenin II (Apigenin-di-C-hexoside)/Isomer; 4: Vicenin II/Isomer; 5: Isoschaftoside (Apigenin-C-hexoside-C-pentoside); 6: Schaftoside; 7: unknown 8: Vitexin; 9: Isovitexin; 10: unknown.
